# Supplementary material for: Bioprospecting Soil Bacteria from Arid Zones to Increase Plant Tolerance to Drought: Growth and Biochemical Status of Maize Inoculated with Plant Growth-Promoting Bacteria Isolated from Sal Island, Cape Verde
Source: MDPI journal article supplement (doi:10.3390/plants11212912), 2022-10-29
Supplement: s1 [file s1]

Table S1: Results obtained for biochemical parameters of bacterial strains grown in osmotic stress (% PEG inhibiting growth 50%) and control (no PEG added). Bacterial strains: *Pantoea* spp. (A); *Klebsiella* spp. (B); *Pseudomonas* spp. (D); *Pseudomonas* spp. (E); *Acinetobacter* spp. (F); *Stenotrophomonas* spp. (G); *Enterobacter* spp. (H); *Enterobacter* spp. (J); *Pantoea* spp. (K); *Pseudomonas* spp. (L); *Rhizobium* spp. (M); *Paenarthrobacter* spp. (N); *Ochrobactrum* spp. (O); *Pseudomonas* spp. (Q); *Rhizobium* spp. (R); *Stenotrophomonas* spp. (S); *Pseudomonas* spp. (T); *Enterobacter* spp. (U). Values are means of three replicates + standard deviation. Statistical analysis was performed relatively to non-inoculated control. Significant differences were considered for  $p \leq 0.05$  and were identified with values in bold and single asterisks (for  $p \leq 0.05$ ) and double asterisks (for  $p \leq 0.01$ ).

|          | LPO (pmoles/M cells) |                                      | SOD ( $\mu$ U/M cells) |                                       | CAT ( $\mu$ U/M cells) |                                      | Proline ( $\mu$ g/M cells)         |                                     | GST ( $\mu$ U/M cells) |                                     | PC (mmol/M cells) |                                     | PROT ( $\mu$ g prot/M cells) |                                     |
|----------|----------------------|--------------------------------------|------------------------|---------------------------------------|------------------------|--------------------------------------|------------------------------------|-------------------------------------|------------------------|-------------------------------------|-------------------|-------------------------------------|------------------------------|-------------------------------------|
|          | control              | PEG                                  | control                | PEG                                   | control                | PEG                                  | control                            | PEG                                 | control                | PEG                                 | control           | PEG                                 | control                      | PEG                                 |
| <b>A</b> | 1.45 $\pm$ 0.32      | <b>4.51 <math>\pm</math> 0.54**</b>  | 111.30 $\pm$ 1.40      | <b>136.21 <math>\pm</math> 2.39**</b> | 0.32 $\pm$ 0.10        | 2.01 $\pm$ 0.60                      | 3.44 $\pm$ 0.36                    | 5.97 $\pm$ 1.14                     | 3.62 $\pm$ 0.02        | <b>4.02 <math>\pm</math> 0.11*</b>  | 0.30 $\pm$ 0.04   | <b>0.48 <math>\pm</math> 0.06*</b>  | 0.29 $\pm$ 0.09              | 0.43 $\pm$ 0.01                     |
| <b>B</b> | 1.46 $\pm$ 0.29      | <b>4.62 <math>\pm</math> 1.16*</b>   | 116.94 $\pm$ 2.06      | 123.95 $\pm$ 7.48                     | 1.23 $\pm$ 0.25        | <b>5.16 <math>\pm</math> 1.68*</b>   | 4.00 $\pm$ 0.56                    | 4.93 $\pm$ 0.23                     | 3.36 $\pm$ 0.15        | 3.37 $\pm$ 0.18                     | 0.46 $\pm$ 0.07   | 0.38 $\pm$ 0.04                     | 0.16 $\pm$ 0.04              | <b>0.33 <math>\pm</math> 0.10*</b>  |
| <b>D</b> | 0.73 $\pm$ 0.28      | <b>1.79 <math>\pm</math> 0.23**</b>  | 120.82 $\pm$ 5.76      | <b>142.78 <math>\pm</math> 12.24*</b> | 1.33 $\pm$ 0.11        | <b>2.44 <math>\pm</math> 0.06**</b>  | 4.26 $\pm$ 0.28                    | <b>5.89 <math>\pm</math> 0.57*</b>  | 4.04 $\pm$ 0.21        | 3.90 $\pm$ 0.36                     | 0.51 $\pm$ 0.12   | 0.52 $\pm$ 0.07                     | 0.44 $\pm$ 0.19              | 0.40 $\pm$ 0.08                     |
| <b>E</b> | 0.77 $\pm$ 0.04      | <b>3.33 <math>\pm</math> 0.81**</b>  | 119.54 $\pm$ 11.65     | 138.86 $\pm$ 10.56                    | 1.31 $\pm$ 0.12        | 1.28 $\pm$ 0.25                      | 7.21 $\pm$ 0.81                    | 7.59 $\pm$ 1.57                     | 3.99 $\pm$ 0.21        | 3.89 $\pm$ 0.21                     | 0.46 $\pm$ 0.09   | 0.46 $\pm$ 0.10                     | 0.33 $\pm$ 0.09              | 0.27 $\pm$ 0.03                     |
| <b>F</b> | 1.29 $\pm$ 0.20      | 1.84 $\pm$ 0.43                      | 111.94 $\pm$ 3.37      | 135.24 $\pm$ 17.86                    | 1.10 $\pm$ 0.12        | 1.53 $\pm$ 0.41                      | 4.07 $\pm$ 0.97                    | 5.30 $\pm$ 0.84                     | 3.45 $\pm$ 0.24        | 3.62 $\pm$ 0.32                     | 0.29 $\pm$ 0.03   | <b>0.49 <math>\pm</math> 0.12*</b>  | 0.23 $\pm$ 0.04              | <b>0.59 <math>\pm</math> 0.14*</b>  |
| <b>G</b> | 1.04 $\pm$ 0.23      | <b>6.19 <math>\pm</math> 1.42**</b>  | 138.17 $\pm$ 11.16     | 145.83 $\pm$ 4.33                     | 1.45 $\pm$ 0.46        | <b>5.39 <math>\pm</math> 1.64*</b>   | 4.63 $\pm$ 0.18                    | 6.11 $\pm$ 1.45                     | 4.27 $\pm$ 0.44        | 3.76 $\pm$ 0.22                     | 0.38 $\pm$ 0.05   | <b>0.48 <math>\pm</math> 0.01*</b>  | 0.23 $\pm$ 0.03              | <b>0.28 <math>\pm</math> 0.01*</b>  |
| <b>H</b> | 1.36 $\pm$ 0.20      | <b>3.79 <math>\pm</math> 0.44**</b>  | 131.57 $\pm$ 1.31      | 119.14 $\pm$ 8.20                     | 1.50 $\pm$ 0.11        | <b>5.43 <math>\pm</math> 1.77*</b>   | 5.74 $\pm$ 0.85                    | 4.84 $\pm$ 0.68                     | 4.09 $\pm$ 0.51        | 3.28 $\pm$ 0.26                     | 0.45 $\pm$ 0.10   | 0.46 $\pm$ 0.05                     | 0.18 $\pm$ 0.06              | 0.26 $\pm$ 0.06                     |
| <b>J</b> | 1.49 $\pm$ 0.60      | <b>4.39 <math>\pm</math> 0.70**</b>  | 123.83 $\pm$ 1.21      | 158.27 $\pm$ 23.66                    | 1.86 $\pm$ 0.78        | 1.22 $\pm$ 0.18                      | 5.31 $\pm$ 0.67                    | 7.06 $\pm$ 1.15                     | 4.52 $\pm$ 0.67        | 4.62 $\pm$ 0.59                     | 0.54 $\pm$ 0.09   | 0.64 $\pm$ 0.15                     | 0.33 $\pm$ 0.07              | 0.27 $\pm$ 0.07                     |
| <b>K</b> | 1.22 $\pm$ 0.18      | <b>0.10 <math>\pm</math> 0.02**</b>  | 129.43 $\pm$ 27.13     | 201.44 $\pm$ 45.91                    | 1.29 $\pm$ 0.40        | <b>2.39 <math>\pm</math> 0.16*</b>   | 5.50 $\pm$ 1.51                    | 9.60 $\pm$ 1.29                     | 3.37 $\pm$ 0.54        | <b>7.82 <math>\pm</math> 0.30**</b> | 0.43 $\pm$ 0.03   | <b>0.89 <math>\pm</math> 0.03**</b> | 0.23 $\pm$ 0.08              | 0.29 $\pm$ 0.05                     |
| <b>L</b> | 1.01 $\pm$ 0.17      | <b>0.08 <math>\pm</math> 0.02**</b>  | 156.63 $\pm$ 19.16     | <b>44.13 <math>\pm</math> 14.03**</b> | 1.25 $\pm$ 0.16        | <b>14.37 <math>\pm</math> 5.51*</b>  | 4.74 $\pm$ 0.67                    | <b>6.75 <math>\pm</math> 1.31*</b>  | 3.33 $\pm$ 0.68        | <b>5.42 <math>\pm</math> 0.19**</b> | 0.37 $\pm$ 0.11   | <b>0.67 <math>\pm</math> 0.08*</b>  | 0.30 $\pm$ 0.03              | <b>0.49 <math>\pm</math> 0.10*</b>  |
| <b>M</b> | 1.34 $\pm$ 0.25      | <b>0.04 <math>\pm</math> 0.01**</b>  | 140.72 $\pm$ 2.19      | 166.68 $\pm$ 36.23                    | 1.36 $\pm$ 0.43        | <b>14.18 <math>\pm</math> 4.77**</b> | 5.40 $\pm$ 0.25                    | 6.22 $\pm$ 0.63                     | 4.32 $\pm$ 0.17        | 4.83 $\pm$ 0.47                     | 0.48 $\pm$ 0.10   | 0.59 $\pm$ 0.07                     | 0.45 $\pm$ 0.08              | <b>0.25 <math>\pm</math> 0.07*</b>  |
| <b>N</b> | 2.48 $\pm$ 0.86      | <b>0.06 <math>\pm</math> 0.01**</b>  | 115.25 $\pm$ 6.66      | 151.74 $\pm$ 33.89                    | 2.48 $\pm$ 0.56        | 3.80 $\pm$ 1.30                      | 7.20 $\pm$ 2.23                    | 10.42 $\pm$ 2.43                    | 4.19 $\pm$ 0.67        | 6.64 $\pm$ 1.53                     | 0.50 $\pm$ 0.11   | <b>0.73 <math>\pm</math> 0.06*</b>  | 0.87 $\pm$ 0.71              | 1.2 $\pm$ 0.50                      |
| <b>O</b> | 0.44 $\pm$ 0.07      | 1.08 $\pm$ 0.42                      | 130.43 $\pm$ 13.56     | 116.46 $\pm$ 17.01                    | 2.12 $\pm$ 0.53        | 1.58 $\pm$ 0.59                      | 5.14 $\pm$ 0.57                    | 5.21 $\pm$ 1.27                     | 3.88 $\pm$ 0.18        | 3.48 $\pm$ 0.66                     | 0.46 $\pm$ 0.04   | 0.40 $\pm$ 0.07                     | 0.31 $\pm$ 0.12              | 0.39 $\pm$ 0.14                     |
| <b>Q</b> | 1.59 $\pm$ 0.42      | 2.07 $\pm$ 0.50                      | 137.68 $\pm$ 6.63      | 102.76 $\pm$ 83.51                    | 1.68 $\pm$ 0.26        | <b>19.42 <math>\pm</math> 5.57**</b> | 5.09 $\pm$ 0.34                    | 5.92 $\pm$ 0.94                     | 3.56 $\pm$ 0.53        | 3.06 $\pm$ 0.39                     | 0.31 $\pm$ 0.04   | 0.38 $\pm$ 0.05                     | 0.13 $\pm$ 0.03              | <b>0.37 <math>\pm</math> 0.09*</b>  |
| <b>R</b> | 1.99 $\pm$ 0.35      | 1.86 $\pm$ 0.47                      | 140.55 $\pm$ 6.45      | <b>105.28 <math>\pm</math> 18.45*</b> | 1.12 $\pm$ 0.12        | <b>7.23 <math>\pm</math> 2.25**</b>  | <b>5.93 <math>\pm</math> 0.56*</b> | 4.72 $\pm$ 0.22                     | 3.84 $\pm$ 0.34        | 3.40 $\pm$ 0.47                     | 0.53 $\pm$ 0.10   | 0.41 $\pm$ 0.09                     | 0.22 $\pm$ 0.06              | 0.52 $\pm$ 0.18                     |
| <b>S</b> | 1.34 $\pm$ 0.24      | <b>12.10 <math>\pm</math> 2.21**</b> | 115.63 $\pm$ 17.49     | 62.53 $\pm$ 55.20                     | 1.36 $\pm$ 0.25        | <b>14.57 <math>\pm</math> 5.13*</b>  | 8.74 $\pm$ 0.78                    | <b>15.82 <math>\pm</math> 3.61*</b> | 4.32 $\pm$ 0.58        | <b>6.05 <math>\pm</math> 0.40*</b>  | 0.54 $\pm$ 0.08   | 0.49 $\pm$ 0.11                     | 0.18 $\pm$ 0.02              | <b>0.39 <math>\pm</math> 0.10*</b>  |
| <b>T</b> | 1.38 $\pm$ 0.24      | <b>2.91 <math>\pm</math> 0.78*</b>   | 139.02 $\pm$ 12.91     | <b>13.05 <math>\pm</math> 3.44**</b>  | 1.61 $\pm$ 0.19        | <b>4.72 <math>\pm</math> 1.75*</b>   | 5.20 $\pm$ 0.08                    | 5.71 $\pm$ 0.40                     | 3.85 $\pm$ 0.13        | 3.90 $\pm$ 0.11                     | 0.36 $\pm$ 0.05   | 0.47 $\pm$ 0.06                     | 0.79 $\pm$ 0.14              | <b>0.29 <math>\pm</math> 0.03**</b> |
| <b>U</b> | 0.62 $\pm$ 0.16      | <b>1.86 <math>\pm</math> 0.42*</b>   | 137.48 $\pm$ 8.61      | 118.35 $\pm$ 20.35                    | 1.45 $\pm$ 0.16        | <b>22.91 <math>\pm</math> 4.57*</b>  | 4.52 $\pm$ 0.19                    | <b>7.43 <math>\pm</math> 1.33*</b>  | 3.72 $\pm$ 0.44        | 4.31 $\pm$ 0.70                     | 0.43 $\pm$ 0.12   | 0.57 $\pm$ 0.13                     | 0.64 $\pm$ 0.31              | 0.53 $\pm$ 0.10                     |

Table S2: Maize plants grown for 7 days in watered and drought conditions. Morphometric parameters (fresh weight and length of plants) and variation of photosynthetic pigments in inoculated (A, D, F, G, Q, R, S, T) and non-inoculated (control – Ctl) plants. Values are means of three replicates + standard deviation. Statistical analysis was performed relatively to non-inoculated watered control. Significant differences were considered for  $p \leq 0.05$  and were identified with values in bold with single asterisks (for  $p \leq 0.05$ ) and double asterisks (for  $p \leq 0.01$ ). Bacterial strains: *Pantoea* spp. (A); *Pseudomonas* spp. (D); *Acinetobacter* spp. (F); *Stenotrophomonas* spp. (G); *Pseudomonas* spp. (Q); *Rhizobium* spp. (R); *Stenotrophomonas* spp. (S); *Pseudomonas* spp. (T).

|            | Shoot Fresh Weight (g) |             | Root Fresh Weight (g) |                      | Shoot lenght (cm) |                     | Root lenght (cm) |                     | Chl a (µg/g FW)        |                         | Chl b (µg/g FW)        |                        | Carotenoids (µg/g FW) |                        |
|------------|------------------------|-------------|-----------------------|----------------------|-------------------|---------------------|------------------|---------------------|------------------------|-------------------------|------------------------|------------------------|-----------------------|------------------------|
|            | watered                | drought     | watered               | drought              | watered           | drought             | watered          | drought             | watered                | drought                 | watered                | drought                | watered               | drought                |
| <b>Ctl</b> | 0.32 ± 0.02            | 0.30 ± 0.02 | 1.91 ± 0.15           | <b>1.26 ± 0.10**</b> | 9.00 ± 0.33       | 9.28 ± 0.69         | 8.08 ± 8.39      | 8.39 ± 0.25         | 378.78 ± 108.73        | 444.62 ± 115.52         | 196.83 ± 61.22         | <b>115.18 ± 22.95*</b> | 152.35 ± 34.82        | <b>102.31 ± 20.32*</b> |
| <b>A</b>   | 0.32 ± 0.04            | 0.29 ± 0.02 | <b>1.49 ± 0.06*</b>   | <b>1.29 ± 0.08**</b> | 9.33 ± 1.15       | 8.72 ± 0.48         | 8.33 ± 0.33      | <b>9.78 ± 0.84*</b> | 331.00 ± 133.64        | 527.22 ± 86.59          | 165.56 ± 69.71         | 138.14 ± 20.77         | 146.99 ± 51.16        | 128.01 ± 16.38         |
| <b>D</b>   | 0.35 ± 0.03            | 0.26 ± 0.05 | 1.65 ± 0.22           | <b>1.12 ± 0.16**</b> | 8.08 ± 0.65       | 8.31 ± 0.63         | 7.78 ± 0.77      | 8.11 ± 0.69         | 274.78 ± 118.33        | <b>611.11 ± 136.06*</b> | 134.10 ± 52.64         | 156.33 ± 33.46         | 119.49 ± 47.64        | 137.77 ± 30.19         |
| <b>F</b>   | 0.32 ± 0.06            | 0.27 ± 0.03 | 1.91 ± 0.26           | <b>1.26 ± 0.09**</b> | 8.61 ± 0.67       | <b>7.67 ± 0.44*</b> | 8.44 ± 0.69      | 8.44 ± 0.59         | 275.59 ± 116.35        | 276.87 ± 188.59         | 135.92 ± 50.37         | <b>77.22 ± 51.99*</b>  | 113.45 ± 45.52        | <b>73.88 ± 51.53*</b>  |
| <b>G</b>   | 0.32 ± 0.05            | 0.30 ± 0.01 | 1.60 ± 0.30           | <b>1.07 ± 0.07**</b> | 8.89 ± 0.51       | 8.67 ± 0.43         | 7.67 ± 0.58      | 8.00 ± 0.58         | 302.32 ± 87.19         | 464.26 ± 133.41         | 147.16 ± 40.40         | 120.04 ± 31.46         | 135.81 ± 29.09        | 104.73 ± 28.71         |
| <b>Q</b>   | 0.34 ± 0.06            | 0.26 ± 0.05 | <b>1.46 ± 0.15*</b>   | <b>1.37 ± 0.16*</b>  | 8.83 ± 0.67       | <b>7.50 ± 0.50*</b> | 8.33 ± 1.01      | 7.22 ± 0.69         | 372.24 ± 49.19         | 365.96 ± 251.04         | 176.54 ± 27.82         | 98.88 ± 55.79          | 157.37 ± 20.30        | 91.02 ± 51.12          |
| <b>R</b>   | 0.33 ± 0.05            | 0.31 ± 0.00 | 1.55 ± 0.31           | <b>1.56 ± 0.12*</b>  | 8.39 ± 0.79       | 8.94 ± 0.42         | 7.33 ± 0.44      | 8.33 ± 0.58         | 286.93 ± 95.30         | 366.62 ± 148.16         | 138.09 ± 40.96         | <b>114.81 ± 19.79*</b> | 127.27 ± 31.73        | 115.68 ± 12.81         |
| <b>S</b>   | 0.33 ± 0.06            | 0.29 ± 0.03 | 1.95 ± 0.15           | <b>1.46 ± 0.20*</b>  | 9.17 ± 0.76       | <b>8.01 ± 0.36*</b> | 8.22 ± 0.51      | <b>9.34 ± 0.59*</b> | 411.88 ± 40.07         | 475.32 ± 172.64         | 204.15 ± 23.01         | 137.57 ± 27.19         | 179.00 ± 27.84        | 139.17 ± 29.15         |
| <b>T</b>   | 0.31 ± 0.05            | 0.33 ± 0.03 | <b>1.42 ± 0.19*</b>   | 1.78 ± 0.20          | 8.17 ± 0.93       | 9.15 ± 0.83         | 7.83 ± 0.44      | 8.49 ± 1.20         | <b>220.00 ± 60.98*</b> | 642.16 ± 185.62         | <b>111.52 ± 29.50*</b> | 159.95 ± 47.48         | <b>97.33 ± 20.92*</b> | 146.56 ± 32.17         |

Table S3: Maize plants grown for 7 days in watered and drought conditions. Biochemical parameters evaluated in inoculated (A, D, F, G, Q, R, S, T strains) and non-inoculated (control – Ctl) plants. Values are means of three replicates + standard deviation. Statistical analysis was performed relatively to non-inoculated (control – Ctl) watered plants. Significant differences were considered for  $p \leq 0.05$  and were identified with values in bold and single asterisks (for  $p \leq 0.05$ ) and double asterisks (for  $p \leq 0.01$ ). Bacterial strains: *Pantoea* spp. (A); *Pseudomonas* spp. (D); *Acinetobacter* spp. (F); *Stenotrophomonas* spp. (G); *Pseudomonas* spp. (Q); *Rhizobium* spp.(R); *Stenotrophomonas* spp. (S); *Pseudomonas* spp. (T).

|     | LPO (nmoles/g FW) |                     | SOD (mU/g FW)       |                     | CAT (mU/g FW)        |                      | Proline (mg/g FW)      |                        | ETS (nmol/min * g FW) |                      | PC (μmol/g FW)      |                     | PROT (mg prot/g FW) |                        | Sugars (mg/g FW)     |                      |
|-----|-------------------|---------------------|---------------------|---------------------|----------------------|----------------------|------------------------|------------------------|-----------------------|----------------------|---------------------|---------------------|---------------------|------------------------|----------------------|----------------------|
|     | watered           | drought             | watered             | drought             | watered              | drought              | watered                | drought                | watered               | drought              | watered             | drought             | watered             | drought                | watered              | drought              |
| Ctl | 3.56 ± 0.93       | 2.76 ± 0.41         | 0.29 ± 0.04         | <b>0.19 ± 0.04*</b> | 35.45 ± 7.11         | 22.66 ± 6.06         | 68.47 ± 15.14          | 100.17 ± 21.61         | 21.58 ± 4.15          | 14.25 ± 3.26         | 1.28 ± 0.36         | 0.92 ± 0.14         | 66.62 ± 9.03        | 81.12 ± 8.30           | 18.26 ± 4.23         | 15.57 ± 3.43         |
| A   | 5.91 ± 1.38       | 2.89 ± 0.56         | 0.33 ± 0.06         | 0.24 ± 0.05         | <b>49.46 ± 3.73*</b> | <b>20.81 ± 4.08*</b> | <b>113.09 ± 18.06*</b> | 85.17 ± 13.10          | 16.99 ± 3.38          | 13.91 ± 2.87         | 1.83 ± 0.59         | 0.92 ± 0.19         | 95.61 ± 16.01       | 70.17 ± 12.70          | 20.45 ± 1.61         | 13.14 ± 0.61         |
| D   | 3.55 ± 0.57       | 3.25 ± 0.47         | 0.34 ± 0.04         | <b>0.19 ± 0.02*</b> | 26.47 ± 4.02         | <b>22.76 ± 0.77*</b> | <b>108.75 ± 10.06*</b> | <b>98.87 ± 8.90*</b>   | 16.37 ± 3.70          | <b>11.43 ± 1.91*</b> | 0.84 ± 0.27         | <b>0.56 ± 0.13*</b> | 78.17 ± 16.80       | 65.59 ± 15.24          | 17.02 ± 3.45         | 18.21 ± 3.50         |
| F   | 4.49 ± 0.81       | 2.96 ± 0.18         | 0.21 ± 0.05         | 0.27 ± 0.04         | 32.36 ± 11.02        | 25.39 ± 2.15         | 69.89 ± 22.11          | 83.35 ± 18.52          | 23.28 ± 3.63          | 16.39 ± 3.94         | 1.04 ± 0.15         | <b>0.43 ± 0.06*</b> | 71.11 ± 7.98        | 80.34 ± 25.85          | 24.41 ± 6.43         | 13.71 ± 3.12         |
| G   | 2.38 ± 0.64       | 2.79 ± 0.55         | <b>0.18 ± 0.04*</b> | 0.22 ± 0.11         | 23.77 ± 6.67         | 25.15 ± 2.76         | 63.99 ± 10.66          | 93.54 ± 8.55           | 13.74 ± 2.97          | <b>12.90 ± 2.12*</b> | 0.97 ± 0.25         | <b>0.45 ± 0.10*</b> | 73.58 ± 11.84       | 69.38 ± 15.36          | 16.98 ± 3.57         | 13.32 ± 3.05         |
| Q   | 2.59 ± 0.67       | 5.18 ± 0.62         | 0.21 ± 0.03         | 0.36 ± 0.13         | <b>22.29 ± 1.09*</b> | 31.55 ± 8.54         | 78.85 ± 12.62          | <b>141.51 ± 21.62*</b> | 15.91 ± 2.19          | 16.00 ± 2.05         | <b>0.63 ± 0.16*</b> | <b>0.59 ± 0.09*</b> | 95.74 ± 17.65       | <b>137.32 ± 36.57*</b> | <b>10.55 ± 1.28*</b> | 19.96 ± 4.64         |
| R   | 2.34 ± 0.76       | 5.85 ± 1.49         | <b>0.12 ± 0.03*</b> | 0.19 ± 0.12         | <b>18.64 ± 3.57*</b> | 42.65 ± 9.86         | 71.20 ± 11.97          | <b>162.40 ± 29.63*</b> | 17.58 ± 0.77          | 26.64 ± 5.11         | <b>0.54 ± 0.08*</b> | 0.68 ± 0.25         | 62.63 ± 8.81        | <b>134.06 ± 19.99*</b> | 18.70 ± 1.04         | <b>37.34 ± 7.34*</b> |
| S   | 4.01 ± 0.95       | 4.09 ± 0.85         | 0.21 ± 0.03         | <b>0.16 ± 0.04*</b> | 30.03 ± 5.54         | 50.73 ± 11.14        | 92.86 ± 13.24          | <b>128.90 ± 16.37*</b> | 23.90 ± 6.05          | 19.78 ± 2.24         | <b>0.59 ± 0.08*</b> | 0.94 ± 0.08         | 69.36 ± 20.25       | <b>91.02 ± 6.83*</b>   | 19.43 ± 4.46         | 21.04 ± 3.65         |
| T   | 3.47 ± 0.36       | <b>5.54 ± 0.76*</b> | 0.34 ± 0.05         | 0.40 ± 0.11         | 25.92 ± 1.39         | 40.58 ± 13.41        | 95.96 ± 11.75          | <b>134.39 ± 18.27*</b> | 19.28 ± 1.86          | 24.04 ± 2.92         | 1.22 ± 0.16         | 1.00 ± 0.17         | 106.69 ± 38.20      | <b>152.57 ± 24.92*</b> | 24.24 ± 3.75         | <b>31.62 ± 3.93*</b> |
